# Supplementary material for: Terminal π–π stacking determines three-dimensional molecular packing and isotropic charge transport in an A–π–A electron acceptor for non-fullerene organic solar cells
Source: Royal Society of Chemistry journal article supplement (doi:10.1039/c7tc01310h), 2017-01-01
Supplement: c7tc01310h1.pdf [file c7tc01310h1.pdf]

Electronic Supplementary Material (ESI) for Journal of Materials Chemistry C.  
This journal is © The Royal Society of Chemistry 2017

## Supporting Information

# Terminal $\pi$ - $\pi$ Stacking Determines Three-Dimensional Molecular Packing and Isotropic Charge Transport in an A- $\pi$ -A Electron Acceptor for Non-Fullerene Organic Solar Cells

*Guangchao Han,<sup>ab</sup> Yuan Guo,<sup>ab</sup> Xiaoxian Song,<sup>c</sup> Yue Wang,<sup>c</sup> Yuanping Yi<sup>\*ab</sup>*

<sup>a</sup> Beijing National Laboratory for Molecular Sciences, CAS Key Laboratory of Organic Solids, CAS Research/Education Center for Excellence in Molecular Sciences, Institute of Chemistry, Chinese Academy of Sciences, Beijing 100190, China.

<sup>b</sup> University of Chinese Academy Sciences, Beijing 100049, China

<sup>c</sup> State Key Laboratory of Supramolecular Structure and Materials, College of Chemistry, Jilin University, Changchun 130012, China.

\*Corresponding authors. E-mail: ypyi@iccas.ac.cn

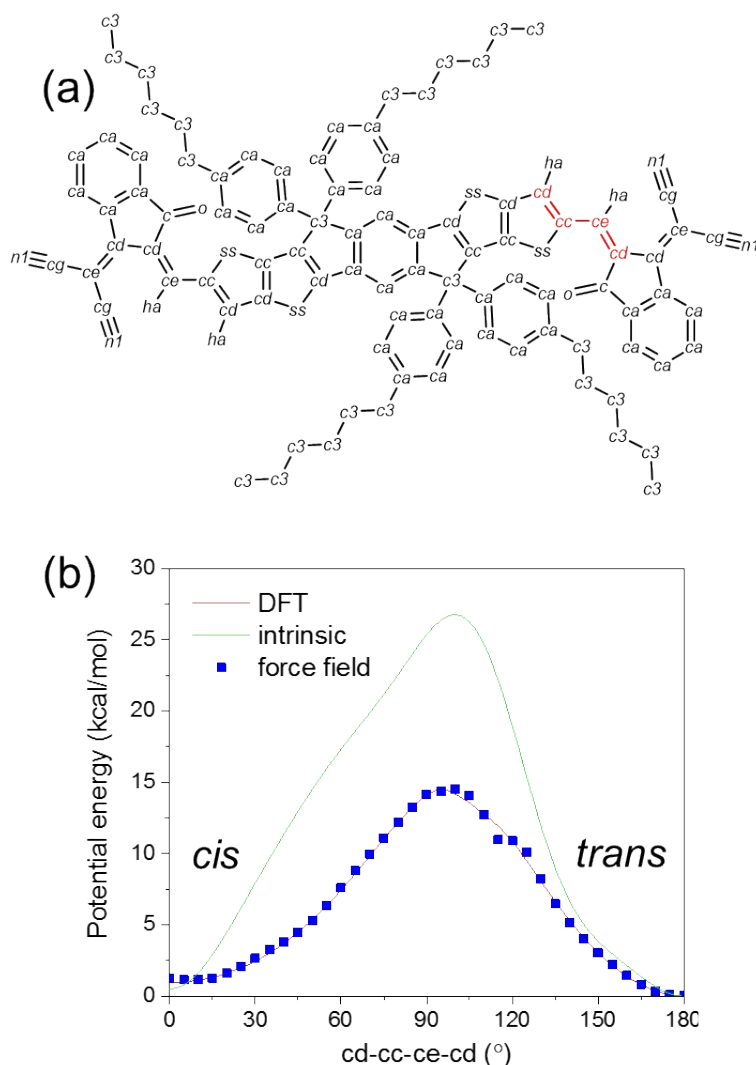

**Figure S1.** (a) Definition of atomic types for ITIC using the general AMBER force field (GAFF). The hidden hydrogen atoms on the c3 atoms are defined as hc. (b) Potential energy for cd-cc-ce-cd calculated by DFT and GAFF along with the fitted intrinsic torsion potential.

The torsion potential between the fused-ring backbone and IC (cd-cc-ce-cd) was fitted according to DFT calculations and inserted in the GAFF using the force matching approach as follows:

- (1) Scanning total potential energies every 5° from 0° to 180° by constrained geometry optimizations by DFT at the B3LYP/6-311G\*\* level;
- (2) Evaluating non-bonded energies for the same set of points by the incomplete force field with the torsion angle in question switched off;
- (3) Calculating intrinsic torsion potential from the difference of the energies obtained in steps (1) and (2), and fitting it using the periodic potential;
- (4) Inserting the fitted intrinsic potential in the force field parameter file to repeat the reference DFT scan.

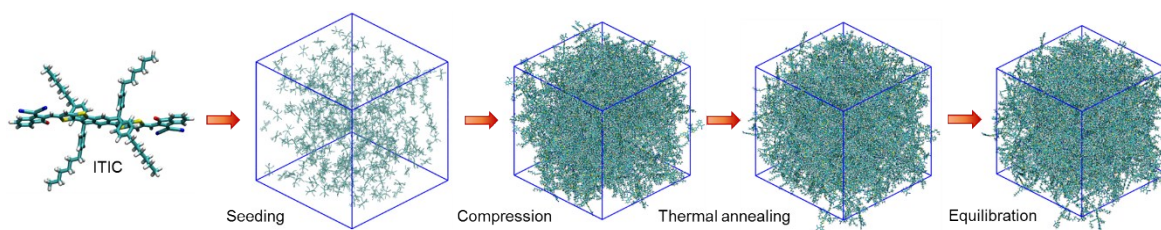

**Figure S2.** Workflow of molecular dynamics simulation of the ITIC film.

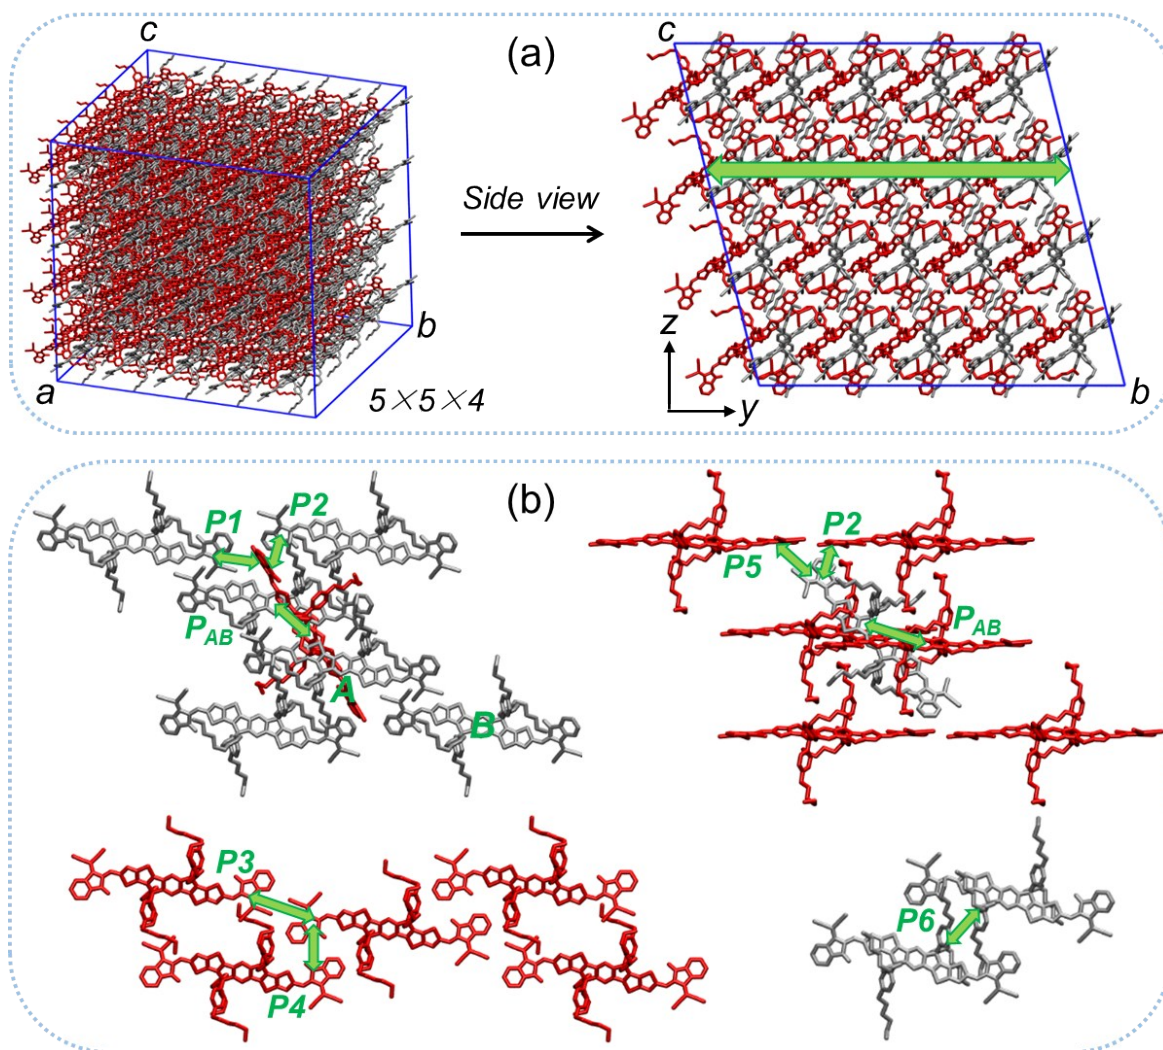

**Figure S3.** (a)  $5 \times 5 \times 4$  supercell of the ITIC crystal. (b) Illustration of possible molecular pairs (*P1*-*P6* and *P<sub>AB</sub>*) in the ITIC crystal.

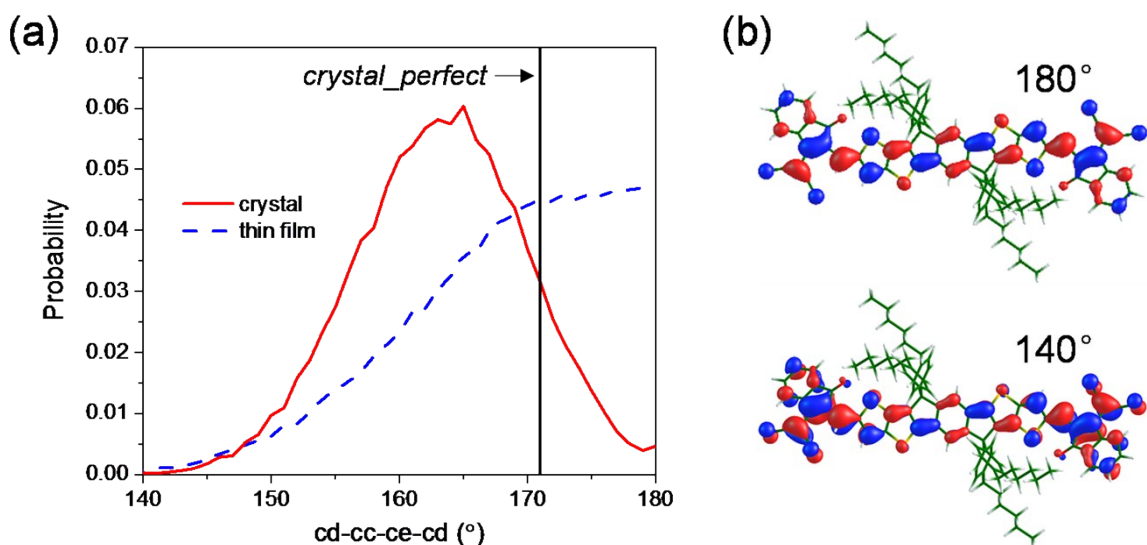

**Figure S4.** (a) Distribution of the  $cd-cc-ce-cd$  torsion angle for ITIC in the simulated thin film and (b) the LUMO of ITIC with the torsion angle set to  $140^\circ$  and  $180^\circ$  calculated by DFT at the B3LYP/6-31G\*\* level.

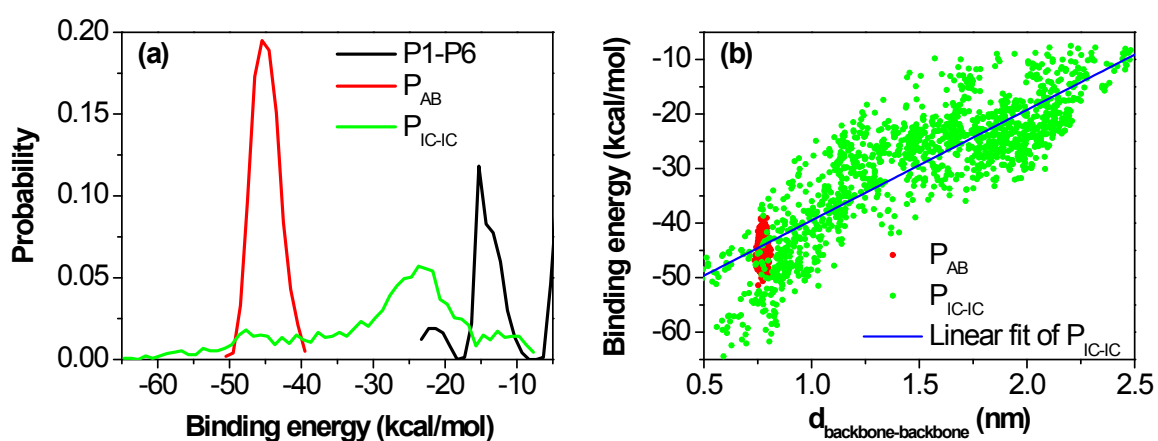

**Figure S5.** (a) Distribution of binding energies for molecular pairs  $P_{AB}$ , P1-P6, and  $P_{IC-IC}$  calculated by the force field. (b) Binding energies vs the backbone-backbone center-of-mass distances for  $P_{AB}$  and  $P_{IC-IC}$ .

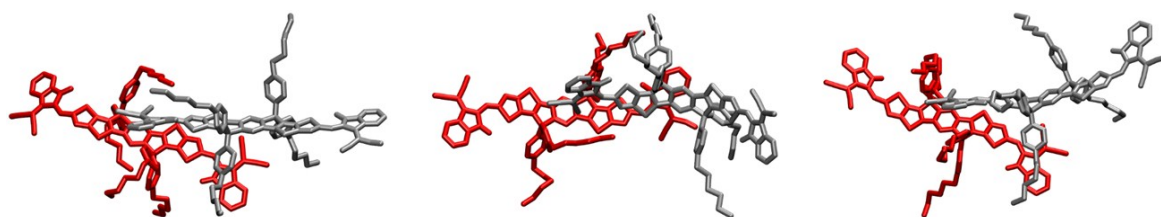

**Figure S6.** Three representative molecular pairs similar to  $P_{AB}$  in the simulated thin film.

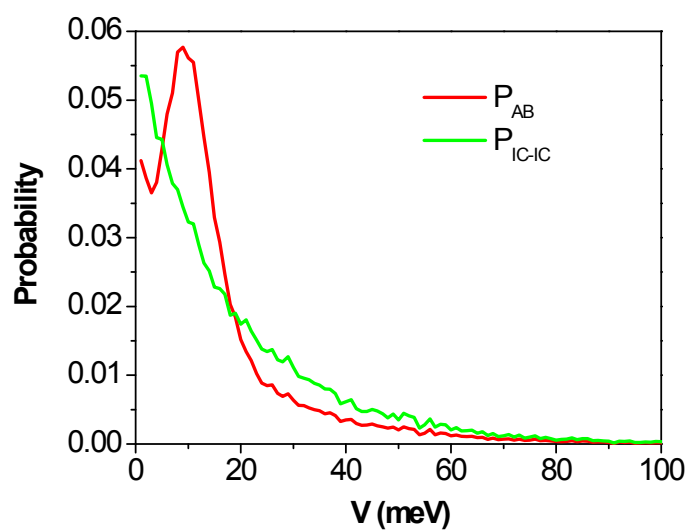

**Figure S7.** Distribution of electronic couplings for  $P_{AB}$  and  $P_{IC-IC}$ .
